# Supplementary material
Source: publisher site journal article supplement (https://www.dovepress.com/article/481792)
Supplement: Supplementary file 1 [file get_supplementary_file.php]

# Supplemental Digital Content

**Supplementary Table S1 1**

**[Supplementary Figure S1 2](#_Toc13632)**

**SupplementaryTable S1.**  Comparison of the efficacy with sTREM-1 of each marker for septic cardiomyopathy events

| **Variable** | **Area** | **Standard error** | ***p* value** | **Z-statistic** |
| --- | --- | --- | --- | --- |
| sTREM-1(pg/ml) | 0.824 | 0.03388 | - | - |
| MYO(ng/ml) | 0.545 | 0.04871 | < 0.0001 | 4.6955 |
| CK-MB(ng/ml) | 0.556 | 0.04915 | < 0.0001 | 4.4844 |
| TNT-HS(ng/ml) | 0.547 | 0.04824 | < 0.0001 | 4.7058 |
| NT-proBNP(pg/ml) | 0.514 | 0.04850 | < 0.0001 | 5.2416 |
| PCT(ng/ml) | 0.630 | 0.04723 | 0.0009 | 3.3325 |
| IL-1β(pg/ml) | 0.647 | 0.04572 | 0.0019 | 3.1069 |
| IL-18(pg/ml) | 0.573 | 0.04884 | < 0.0001 | 4.2261 |

MYO: myoglobin;NT-proBNP: N-Terminal pronatriuretic peptide; CK-MB: creatine kinase isoenzyme; TNT-HS: highly sensitive troponin; PCT: Procalcitonin; IL-1β: Interleukin-1β; IL-18: Interleukin18; sTREM-1: soluble myeloid cells trigger receptor-1; P<0.05 means statistically significant.

## Supplementary Fig. S1


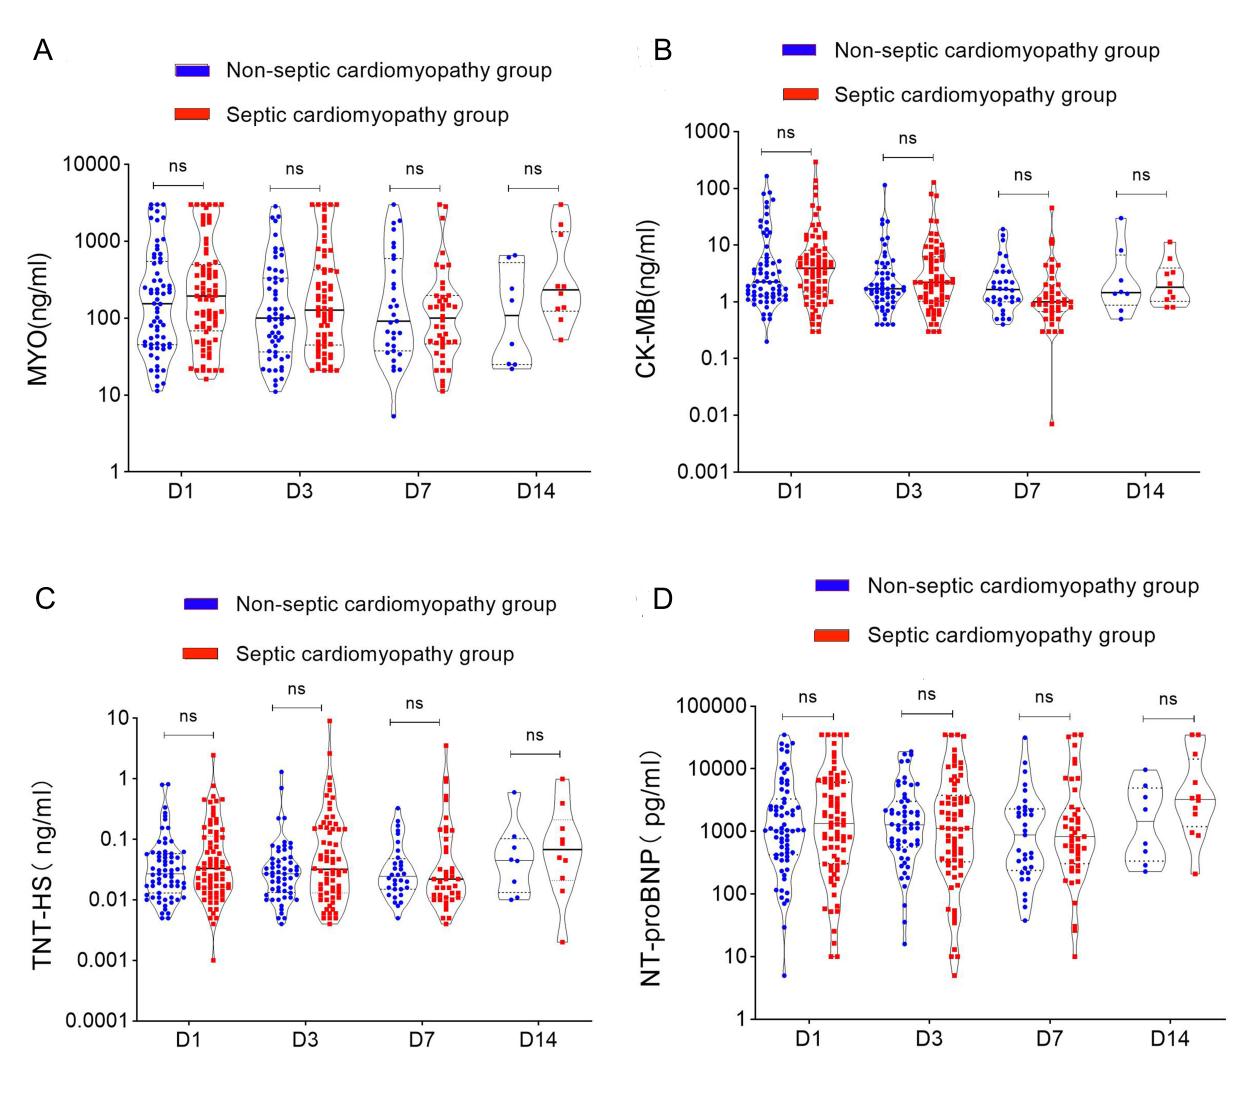


**Fig. S1** Changes in markers of cardiac dysfunction in patients with Non-SCM and SCM after admission to ICU. **A**, MYO. **B**, CK-MB. **C**, TNT-HS. **D**,NT-proBNP. MYO, myoglobin; CK-MB, creatine kinase isoenzyme; TNT-HS, highly sensitive troponin. NT-proBNP, N-Terminal pronatriuretic peptide; ns means no statistically significant.
